# Supplementary material for: Development of operational protocols for the analysis of primary and secondary fingermark lifts by MALDI-MS imaging
Source: Royal Society of Chemistry journal article supplement (doi:10.1039/c6ay01406b), 2016-01-01

**Figure S1.** The MALDI MS Imaging analysis of a carbon black powder developed and "primary" lifted split natural fingerprint; (A) MALDI-MS image of the endogenous species eicosanoic acid ( $m/z$  311.2), (B) the spectrum extracted from the half of the fingerprint treated with carbon black and sprayed with matrix (ROI shown in (i)) and (C) the spectrum extracted from the half of the fingerprint only treated with carbon black (ROI shown in (i)). Both the MS image and MS spectra show no contribution of carbon black as a potential matrix to the ionisation of the molecules contained in the fingerprint

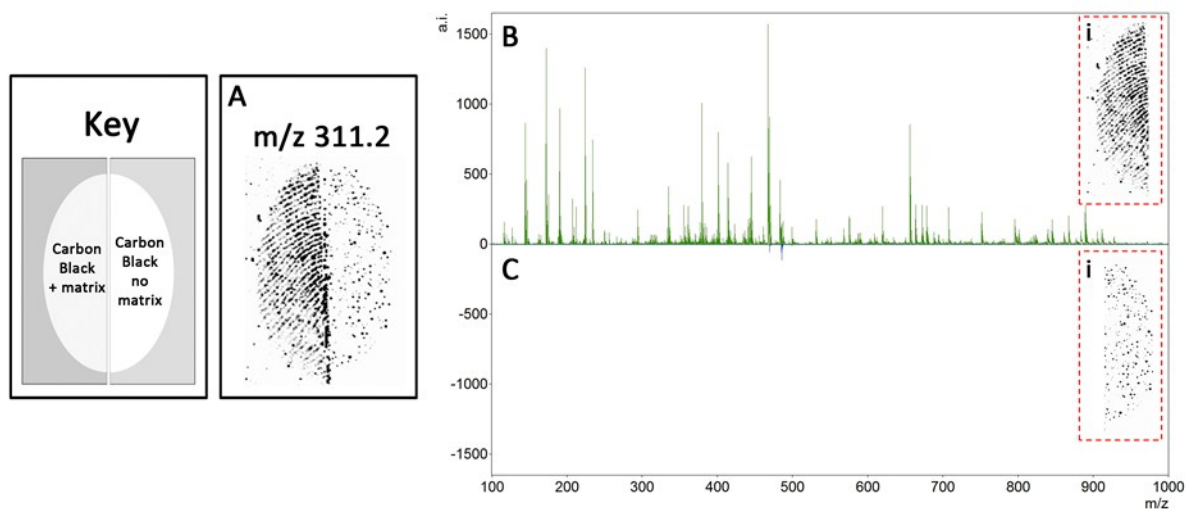

Supplement: c6ay01406b1.pdf [file c6ay01406b1.pdf]
